# Supplementary material
Source: publisher figshare collection journal article supplement (https://tandf.figshare.com/articles/dataset/_/12854982)
Supplement: Supplementary file 1 [file 1]

### Correlation between and within clinical test scores, spatiotemporal gait parameters and walking-adaptability outcome measures

Considerable redundancy was found between clinical test scores and spatiotemporal gait parameters (second block in top row in Figure S1). Of the 54 possible correlations, 45 (83.3%) were significant, out of which 28 (51.9%) were high, 13 (24.1%) were moderate and 4 (7.4%) were low. This was also the case for among clinical test scores (top left block in Figure S1). All 15 possible correlations were significant (100.0%), out of which 3 (20.0%) were very high, 6 (40.0%) were high, 2 (13.3%) were moderate and 4 (26.7%) were low. The spatiotemporal gait parameters were also highly correlated (second block along the diagonal in Figure S1). Of the 36 possible correlations, 34 (94.4%) were significant, out of which 7 (19.4%) were very high, 8 (22.2%) were high, 10 (27.8%) were moderate and 9 (25.0%) were low. For Interactive Walkway walking-adaptability outcome measures, a lower percentage of significant correlations was found (bottom right block in Figure S1). Of the 325 possible correlations, only 57 (17.5%) were significant, out of which 1 (0.3%) was very high, 6 (1.8%) were high, 19 (5.8%) were moderate and 31 (9.5%) were low. Redundancy in the outcome measures thus seems to be less for walking-adaptability outcome measures, indicating that the various walking-adaptability tasks seem to assess different aspects of walking adaptability.

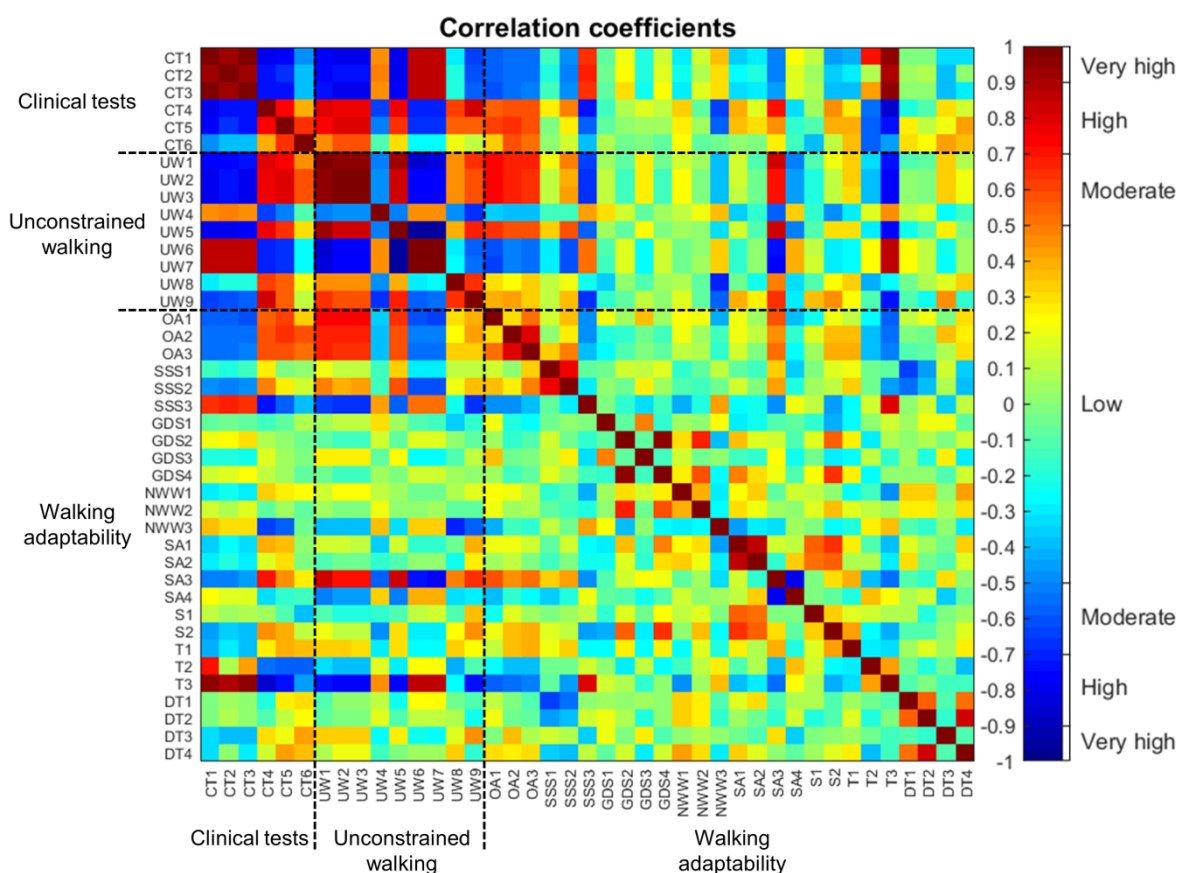

**Figure S1.** Overview of the correlation coefficients between (i.e., outer boxes) and within (i.e., boxes around the diagonal) the various types of walking ability assessments (i.e., clinical tests [CT1-6],

unconstrained walking [UW1-9] and walking adaptability [OA1-3, SSS1-3, GDS1-4, NWW1-3, SA1-4, S1-2, T1-3, DT1-4]) in stroke patients. The abbreviations can be found in the Table S1. The dotted black lines separate the three types of walking ability assessments.

**Table S1.** Abbreviations.

| Abbreviation                 | Task                                              | Outcome measure               |
|------------------------------|---------------------------------------------------|-------------------------------|
| <i>Clinical tests</i>        |                                                   |                               |
| CT1                          | Timed-Up-and-Go test                              | Time (s)                      |
| CT2                          | 10-meter walking test – comfortable walking speed | Time (s)                      |
| CT3                          | 10-meter walking test – maximum walking speed     | Time (s)                      |
| CT4                          | Tinetti Balance Assessment                        | Score                         |
| CT5                          | 7-item Berg Balance Scale                         | Score                         |
| CT6                          | Functional Reach Test                             | Reaching distance (cm)        |
| <i>Unconstrained walking</i> |                                                   |                               |
| UW1                          | 8-meter walking test                              | Walking speed (cm/s)          |
| UW2                          |                                                   | Step length (cm)              |
| UW3                          |                                                   | Stride length (cm)            |
| UW4                          |                                                   | Step width (cm)               |
| UW5                          |                                                   | Cadence (steps/min)           |
| UW6                          |                                                   | Step time (s)                 |
| UW7                          |                                                   | Stride time (s)               |
| UW8                          |                                                   | Symmetry step length (%)      |
| UW9                          |                                                   | Symmetry step time (%)        |
| <i>Walking adaptability</i>  |                                                   |                               |
| OA1                          | Obstacle avoidance                                | Margins trailing limb (cm)    |
| OA2                          |                                                   | Margins leading limb (cm)     |
| OA3                          |                                                   | Success rate (%)              |
| SSS1                         | Sudden stops-and-starts                           | Sudden-stop margins (cm)      |
| SSS2                         |                                                   | Success rate (%)              |
| SSS3                         |                                                   | Initiation time (s)           |
| GDS1                         | Goal-directed stepping                            | Stepping accuracy (cm)        |
| GDS2                         |                                                   | Normalized walking speed (%)  |
| GDS3                         |                                                   | Stepping accuracy (cm)        |
| GDS4                         |                                                   | Normalized walking speed (%)  |
| NWW1                         | Narrow walkway                                    | Success rate (%)              |
| NWW2                         |                                                   | Normalized walking speed (%)  |
| NWW3                         |                                                   | Normalized step width (%)     |
| SA1                          | Speed adjustments                                 | Success rate (%)              |
| SA2                          |                                                   | Normalized walking speed (%)  |
| SA3                          |                                                   | Success rate (%)*             |
| SA4                          |                                                   | Normalized walking speed (%)* |
| S1                           | Slalom                                            | Success rate (%)              |
| S2                           |                                                   | Normalized walking speed (%)  |
| T1                           | Turning                                           | Success rate (%)              |
| T2                           |                                                   | Turning time (s)              |
| T3                           |                                                   | Turning time (s)              |
| DT1                          | Dual-task walking                                 | Normalized walking speed (%)  |
| DT2                          |                                                   | Success rate dual task (%)    |
| DT3                          |                                                   | Normalized success rate (%)   |
| DT4                          |                                                   | Success rate dual task (%)    |
